# Supplementary material for: The Effect of Dietary Lycopene Supplementation on Drip Loss during Storage of Lamb Meat by iTRAQ Analysis
Source: MDPI journal article supplement (doi:10.3390/antiox10020198), 2021-01-29
Supplement: s1 [file s1]

## Supplementary figures

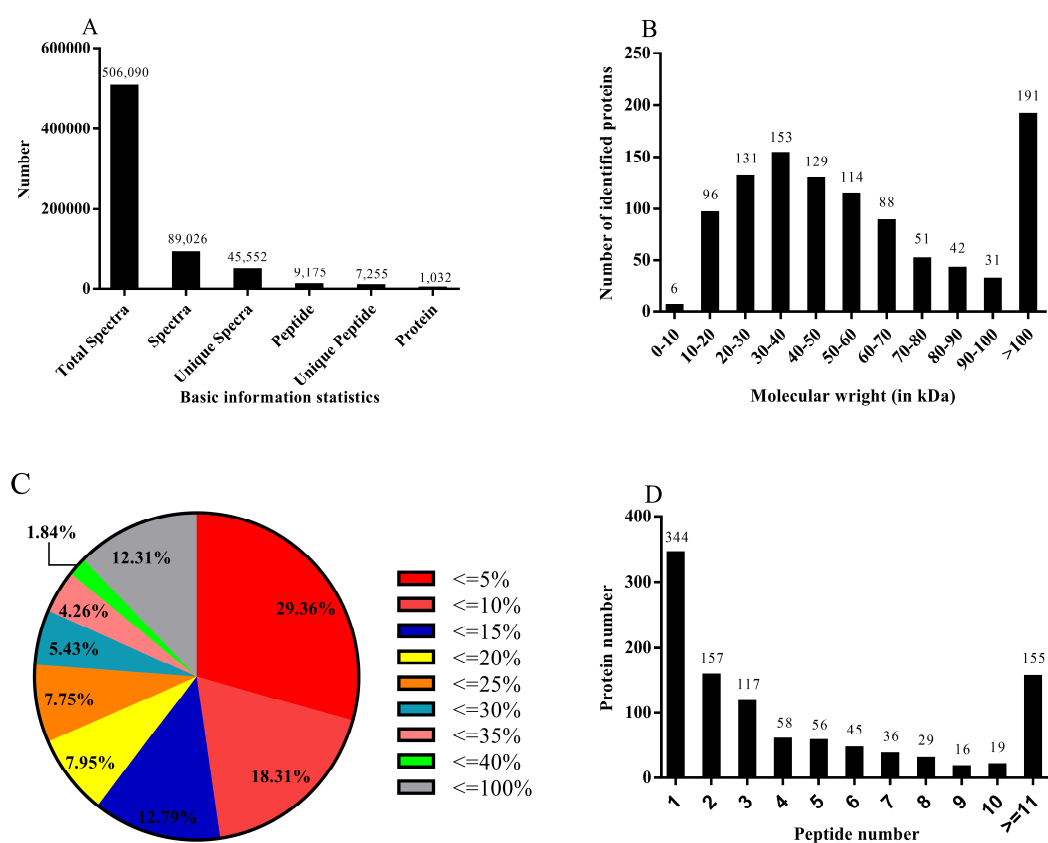

**Figure S1.** Overview of quantitative proteomics. (A) Basic information statistics of protein identification, (B) distribution of the identified proteins according to molecular weight (in kD), (C) coverage (i.e., percentage of protein sequences covered by identified peptides), and (D) distribution of the identified peptides according to their numbers in proteins.

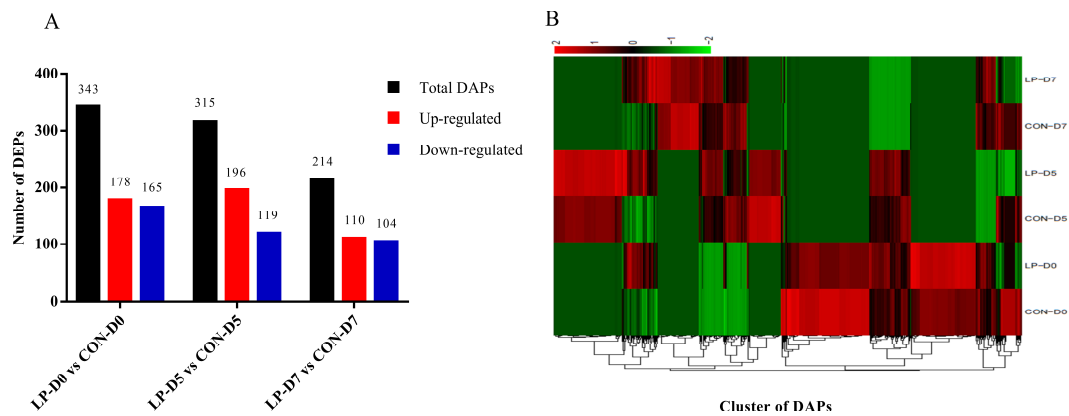

**Figure S2.** Differentially abundant proteins number and Heatmap between the CON and LP groups on days 0, 5 and 7. (A) Number of differentially expressed proteins on days 0, 5 and 7 between the control and lycopene supplementation group. LP-D0, LP-D5 and LP-D7 means lycopene supplementation group on day 0, 5 and 7, respectively. CON-D0, CON-D5 and CON-D7 means control group on day 0, 5 and 7, respectively. (B) Heatmap based on cluster analysis of DAPs following different storage time between the CON and LP groups. DAPs: differentially abundant proteins.
